# Supplementary material for: The checkpoint-dependent nuclear accumulation of Rho1p exchange factor Rgf1p is important for tolerance to chronic replication stress
Source: PubMed Central journal article supplement — Mol Biol Cell. 2014 Apr 1;25(7):1137–50. doi: 10.1091/mbc.E13-11-0689 (PMC3967976; doi:10.1091/mbc.e13-11-0689), 2014-04-01

# Supplemental Materials

*Molecular Biology of the Cell*

Muñoz et al.

## Supplemental Figure Legends

**Figure S1.** (A) Growing Rgf1p $\Delta$ DEP-GFP cells were stained with 50 $\mu$ g/ml Hoechst 33324 for 5 min to visualize the nucleus and the GFP fluorescence. (B) Early-log phase cells Rgf1p-GFP, Rgf1p $\Delta$ N-GFP, Rgf1p $\Delta$ DEP-GFP, Rgf1pFPTP-GFP, Rgf1p $\Delta$ PH-GFP and Rgf1p $\Delta$ CNH-GFP grown in YES liquid medium at 28°C were collected and visualized for Cfw staining. Cfw was added at 20 $\mu$ g/ml, followed by immediate examination of the cells. Note that as compared with the wild-type, in the  $\Delta$ PH and  $\Delta$ CNH mutants the Cfw label often has a more monopolar distribution.

**Figure S2.** Cells expressing a functional Rgf1p-GFP from its endogenous promoter were grown in YES medium to mid log-phase and subjected to different treatments for the indicated times. For hypertonic stress, cells were subjected to 1.2 M KCl for 15 min. For thermal shock, cultures growing at 25°C were incubated at 39°C for 2h. To induce mating, a cross from h<sup>-</sup>/h<sup>+</sup> Rgf1-GFP cells (PG40xSM209) was sporulated on MEA and observed by fluorescence after 12-14 h.

**Figure S3.** Cells expressing Rgf1p-GFP, Rgf2-GFP and Rgf3p-GFP from their own promoter were treated with HU (12.5 mM) for 2h at 28°C and photographed.

**Figure S4.** The mutation in Rgf1pGFP- $\Delta$ 189 causes its nuclear accumulation in the absence of HU. Domain structure of Rgf1p indicating positions for NES1 and NES2 in the full-length protein and in the C-terminus deletions. Photos from exponentially growing Rgf1pGFP- $\Delta$ 189 and Rgf1pGFP- $\Delta$ 131 cultures are shown.

**Fig. S1**

**A**

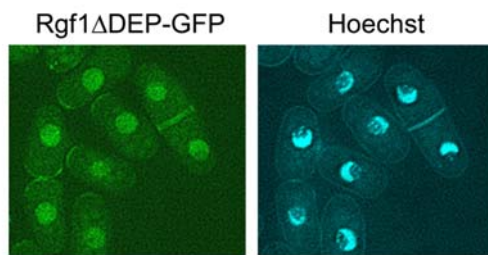

**B**

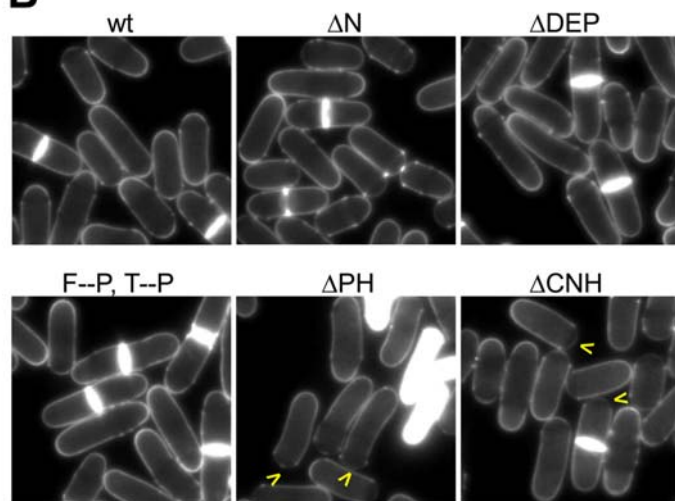

**Fig. S2**

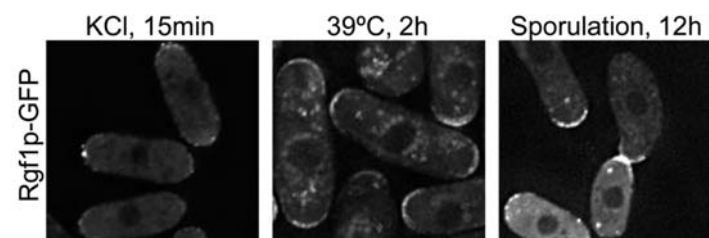

**Fig. S3**

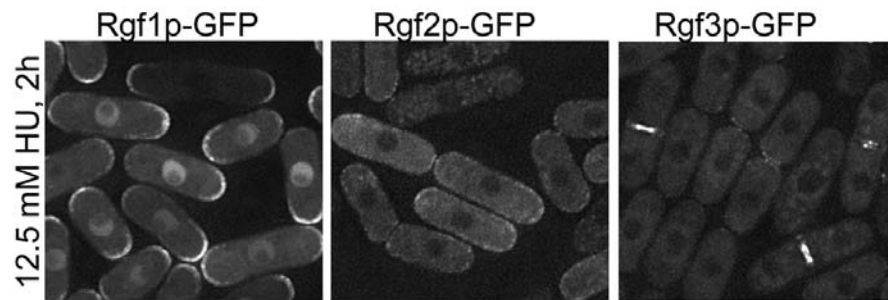

**Fig. S4**

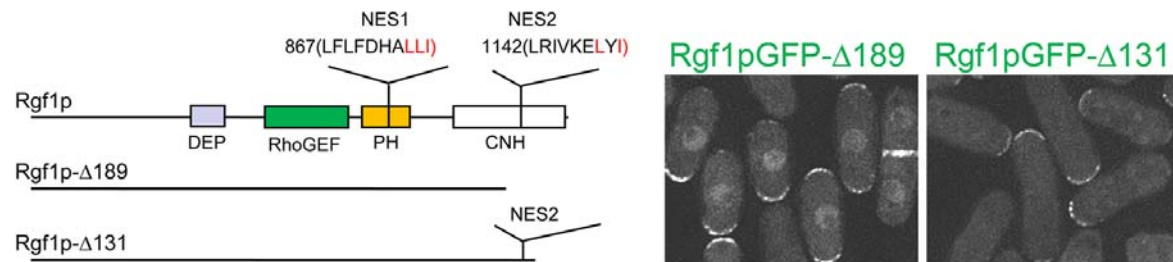

**Fig. S5**

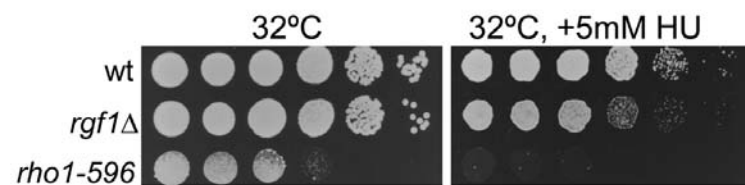

Supplement: supp_E13-11-0689v1_CombinedSupMats.pdf.pdf [file supp_E13-11-0689v1_CombinedSupMats.pdf.pdf]
